# Supplementary material for: Lessons From the Mixed-Meal Tolerance Test: Use of 90-minute and fasting C-peptide in pediatric diabetes
Source: PubMed Central journal article supplement — Diabetes Care. 2013 Jan 17;36(2):195–201. doi: 10.2337/dc12-0836 (PMC3554273; doi:10.2337/dc12-0836), 2013-01-17
Supplement: supp_dc12-0836v120836_DC120836SupplementaryData.pdf [file supp_dc12-0836v120836_DC120836SupplementaryData.pdf]

SUPPLEMENTARY DATA

**Supplementary Table 1.** Sensitivity and specificity for detecting peak C-peptide  $\geq 0.2$ nmol/l using AUC CP  $\geq 23$ nmol/l/150minutes

| Duration/months(n)         | True positive rate<br>Sensitivity %(n) | True negative rate<br>Specificity %(n) | Patients misdiagnosed<br>%(n) |
|----------------------------|----------------------------------------|----------------------------------------|-------------------------------|
| 3(321)                     | 99.7 (308/309)                         | 100(12/12)                             | 0.3(1/321)                    |
| 9(290)                     | 98(233/237)                            | 96(51/53)                              | 2(6/290)                      |
| 18(269)                    | 97(165/171)                            | 95(93/98)                              | 4(11/269)                     |
| 30(229)                    | 92(101/110)                            | 98(117/119)                            | 5(11/229)                     |
| 48(167)                    | 98(55/56)                              | 97(108/111)                            | 2(4/167)                      |
| 72(58)                     | 92(12/13)                              | 98(44/45)                              | 3(2/58)                       |
| <b>Whole cohort (1334)</b> | 98(874/896)                            | 97(425/438)                            | 3(35/1334)                    |

**Supplementary Table 2.** 90 minute serum C-peptide is highly correlated to AUC C-peptide and peak C-peptide during a MMTT. \* $p < 0.0001$

| Diabetes duration months (n) | Correlation ( $r_s$ ) between AUC and 90min CP<br>(Peak and 90 min CP) |
|------------------------------|------------------------------------------------------------------------|
| 3(321)                       | 0.98*(0.97)                                                            |
| 9(290)                       | 0.99*(0.98)                                                            |
| 18(269)                      | 0.99*(0.98)                                                            |
| 30(229)                      | 0.99*(0.96)                                                            |
| 48(167)                      | 0.99*(0.98)                                                            |
| 72(58)                       | 0.96*(0.91)                                                            |

**Supplementary Table 3.** Fasting C-peptide is well correlated to AUC and 90 minute C-peptide during the MMTT \* $p < 0.0001$

| Diabetes duration months (n) | Correlation ( $r_s$ ) between AUC and FCP<br>(Peak and FCP) |
|------------------------------|-------------------------------------------------------------|
| 3(321)                       | 0.71*(0.65)                                                 |
| 9(290)                       | 0.84*(0.80)                                                 |
| 18(269)                      | 0.89*(0.85)                                                 |
| 30(228)                      | 0.89*(0.84)                                                 |
| 48(167)                      | 0.88*(0.85)                                                 |
| 72(58)                       | 0.71*(0.66)                                                 |

SUPPLEMENTARY DATA

**Supplementary Table 4.** Proportion of patients with C-peptide peak at different time points during the MMTT. The highest proportion of patients reaching peak C-peptide is in bold font.

| Time from diagnosis months(n) | % patients (95% CI) , with Peak CP occurring at various time points during MMTT/min |                  |                         |                         |                         |                  | Time to C-peptide peak Mean(95% CI) minutes |
|-------------------------------|-------------------------------------------------------------------------------------|------------------|-------------------------|-------------------------|-------------------------|------------------|---------------------------------------------|
|                               | 0                                                                                   | 30               | 60                      | 90                      | 120                     | 150              |                                             |
| 3(321)                        | 0.6 (0.1-2.5)                                                                       | 10.0 (7.0-13.9)  | 16.5 (12.7-21.1)        | 26.2 (21.5-31.4)        | <b>31.8 (26.8-37.2)</b> | 15.0 (11.3-19.4) | 97.0 (93.0-101.0)                           |
| 9(290)                        | 4.1 (2.3-7.3)                                                                       | 9.0 (6.1-13.0)   | 18.3 (14.1-23.3)        | <b>26.9 (22.0-32.5)</b> | 25.2 (20.4-30.7)        | 16.6 (12.6-21.5) | 92.9(88.2-97.6)                             |
| 18(269)                       | 4.5 (2.4-7.9)                                                                       | 13.4 (9.7-18.2)  | 20.1 (15.6-25.5)        | 23.4 (18.6-29.0)        | <b>26.0 (21.0-31.8)</b> | 12.6 (9.0-17.4)  | 87.4 (82.4-92.3)                            |
| 30(229)                       | 15.7 (11.4-21.2)                                                                    | 12.7 (8.8-17.8)  | 16.6 (12.1-22.2)        | <b>20.1 (15.2-26.0)</b> | 17.0 (12.5-22.7)        | 17.9 (13.3-23.6) | 79.1 (72.5-85.7)                            |
| 48(167)                       | 16.8 (11.6-23.5)                                                                    | 15.0 (10.1-21.5) | 15.6 (10.6-22.2)        | 20.4 (14.7-27.4)        | <b>24.0 (17.8-31.3)</b> | 8.4 (4.8-13.9)   | 73.5 (66.2-80.8)                            |
| 72(58)                        | 13.8 (6.6-25.9)                                                                     | 17.2 (9.0-29.9)  | <b>24.1 (14.3-37.5)</b> | 22.4 (12.9-35.6)        | 13.8 (6.6-25.9)         | 8.6 (3.2-19.7)   | 69.3 (57.6-81.1)                            |

SUPPLEMENTARY DATA

**Supplementary Table 5.** Fasting C-peptide is higher in patients with (A) shorter duration diabetes and (B) an older age of diagnosis.

| Diabetes duration months(n) | Fasting C-peptide median (25 <sup>th</sup> - 75 <sup>th</sup> centile) (nmol/l) |                   |                   |                  |                                          |
|-----------------------------|---------------------------------------------------------------------------------|-------------------|-------------------|------------------|------------------------------------------|
|                             | Whole Cohort                                                                    | <10 years         | 10-13 years       | ≥13 years        | P value across age of diagnosis tertiles |
| 3(321)                      | 0.21 (0.13-0.32)                                                                | 0.15 (0.09-0.20)  | 0.21 (0.14-0.39)  | 0.27 (0.19-0.37) | <0.0001                                  |
| 9(290)                      | 0.17 (0.08-0.26)                                                                | 0.11 (0.05-0.18)  | 0.18 (0.09-0.26)  | 0.22 (0.16-0.38) | <0.0001                                  |
| 18(269)                     | 0.11 (0.04-0.20)                                                                | 0.07 (0.02-0.13)  | 0.09 (0.04-0.21)  | 0.16 (0.06-0.26) | <0.0001                                  |
| 30(228)                     | 0.07 (0.02-0.16)                                                                | 0.03 (0.01-0.11)  | 0.05 (0.01-0.12)  | 0.13 (0.07-0.22) | <0.0001                                  |
| 48(167)                     | 0.05 (0.02-0.13)                                                                | 0.02 (<0.03-0.07) | 0.06 (0.03-0.13)  | 0.07 (0.02-0.21) | 0.004                                    |
| 72(58)                      | 0.03 (0.01-0.08)                                                                | 0.03 (0.01-0.07)  | 0.03 (<0.03-0.08) | 0.04 (0.01-0.08) | 0.9                                      |

**Supplementary Table 6.** The difference between peak and 90 minute C-peptide during the MMTT.

| Diabetes duration in months (n) | C-peptide during MMTT median (25 <sup>th</sup> -75 <sup>th</sup> centile)(nmol/l) |                  |                                      |
|---------------------------------|-----------------------------------------------------------------------------------|------------------|--------------------------------------|
|                                 | Peak                                                                              | 90 minute        | C peptide difference (Peak-90minute) |
| 3(321)                          | 0.70 (0.48-1.1)                                                                   | 0.62 (0.41-1.0)  | 0.05 (0-0.12)                        |
| 9(290)                          | 0.50 (0.28-0.84)                                                                  | 0.44 (0.24-0.74) | 0.03 (0-0.10)                        |
| 18(269)                         | 0.29 (0.12-0.55)                                                                  | 0.25 (0.10-0.47) | 0.02 (0-0.07)                        |
| 30(229)                         | 0.18 (0.06-0.36)                                                                  | 0.16 (0.04-0.30) | 0.01 (0-0.04)                        |
| 48(167)                         | 0.13 (0.04-0.30)                                                                  | 0.1 (0.04-0.25)  | 0.01 (0-0.04)                        |
| 72(58)                          | 0.09 (0.03-0.17)                                                                  | 0.06 (0.02-0.15) | 0.02 (0-0.04)                        |
| <b>Whole cohort (1334)</b>      | 0.36 (0.13-0.71)                                                                  | 0.31 (0.11-0.61) | 0.02 (0-0.08)                        |

**Supplementary Table 7A.** C-peptide correlations during the 3 assay periods at 3 months duration. \*p<0.0001

|                                                       | Group 1<br>Before 1 <sup>st</sup> June<br>2000 | Group 2<br>1/6/2000-<br>30/09/2004 | Group 3<br>≥1/10/2004 | Whole group     |
|-------------------------------------------------------|------------------------------------------------|------------------------------------|-----------------------|-----------------|
| <b>n</b>                                              | 184                                            | 37                                 | 100                   | 322             |
| <b>r<sub>s</sub> AUC-90minCP<br/>(PeakCP-90minCP)</b> | 0.97*<br>(0.97)                                | 0.97*<br>(0.96)                    | 0.98*<br>(0.98)       | 0.98*<br>(0.98) |
| <b>r<sub>s</sub> AUC-FCP<br/>(PeakCP-FCP)</b>         | 0.62*<br>(0.68)                                | 0.76*<br>(0.85)                    | 0.73*<br>(0.70)       | 0.71*<br>(0.71) |

SUPPLEMENTARY DATA

**Supplementary Table 7B.** C-peptide correlations during the 3 assay periods at 9 months duration.  
\*p<0.0001

|                                                       | <b>Group 1<br/>Before June 2000</b> | <b>Group 2<br/>1/6/2000-<br/>30/09/2004</b> | <b>Group 3<br/>&gt;=1/10/2004</b> | <b>Whole group</b> |
|-------------------------------------------------------|-------------------------------------|---------------------------------------------|-----------------------------------|--------------------|
| <b>n</b>                                              | 171                                 | 27                                          | 90                                | 291                |
| <b>r<sub>s</sub> AUC-90minCP<br/>(PeakCP-90minCP)</b> | 0.97*<br>(0.98)                     | 0.97*<br>(0.98)                             | 0.99*<br>(0.99)                   | 0.98*<br>(0.99)    |
| <b>r<sub>s</sub> AUC-FCP<br/>(PeakCP-FCP)</b>         | 0.75*<br>(0.85)                     | 0.92*<br>(0.86)                             | 0.88*<br>(0.85)                   | 0.86*<br>(0.85)    |

**Supplementary Table 7C.** C-peptide correlations during the 3 assay periods at 18 months duration.  
\*p<0.0001

|                                                       | <b>Group 1<br/>Before June 2000</b> | <b>Group 2<br/>1/6/2000-<br/>30/09/2004</b> | <b>Group 3<br/>&gt;=1/10/2004</b> | <b>Whole group</b> |
|-------------------------------------------------------|-------------------------------------|---------------------------------------------|-----------------------------------|--------------------|
| <b>n</b>                                              | 179                                 | 16                                          | 73                                | 270                |
| <b>r<sub>s</sub> AUC-90minCP<br/>(PeakCP-90minCP)</b> | 0.98*<br>(0.98)                     | 0.99*<br>(0.99)                             | 0.99*<br>(0.99)                   | 0.98*<br>(0.99)    |
| <b>r<sub>s</sub> AUC-FCP<br/>(PeakCP-FCP)</b>         | 0.80*<br>(0.90)                     | 0.89*<br>(0.91)                             | 0.77*<br>(0.87)                   | 0.79*<br>(0.89)    |
